# Supplementary material for: Plasma antibodies to oral bacteria and risk of pancreatic cancer in a large European prospective cohort study
Source: HighWire-hosted journal article supplement (doi:10.1136/gutjnl-2012-303006), 2012-09-18
Supplement: gutjnl-2012-303006supp.pdf [file gutjnl-2012-303006supp.pdf]

**Supplemental Table 1.** Percent concordance in 532 EPIC case and control subjects having replicate samples for each oral bacterial strain

| <b>Bacteria</b>                            | <b>Percent concordance*</b> |
|--------------------------------------------|-----------------------------|
| <i>A. actinomycetemcomitans</i> ATCC 29523 | 0.72                        |
| <i>A. actinomycetemcomitans</i> ATCC 43718 | 0.71                        |
| <i>A. naeslundii</i> ATCC 12104            | 0.84                        |
| <i>B. dentium</i> ATCC 27534               | 0.77                        |
| <i>C. matruchotii</i> ATCC 14266           | 0.78                        |
| <i>C. ochracea</i> ATCC 33596              | 0.77                        |
| <i>E. corrodens</i> ATCC 23834             | 0.72                        |
| <i>E. faecalis</i> ATCC 29212              | 0.77                        |
| <i>F. magna</i> ATCC 29328                 | 0.82                        |
| <i>F. nucleatum</i> ATCC 25586             | 0.72                        |
| <i>F. periodonticum</i> ATCC 33693         | 0.80                        |
| <i>F. polymorphum</i> ATCC 10953           | 0.80                        |
| <i>P. anaerobius</i> ATCC 27337            | 0.77                        |
| <i>P. gingivalis</i> ATCC 33277            | 0.77                        |
| <i>P. gingivalis</i> ATCC 53978            | 0.73                        |
| <i>P. intermedia</i> ATCC 25611            | 0.75                        |
| <i>P. melaninogenica</i> ATCC 25845        | 0.68                        |
| <i>P. micra</i> ATCC 33270                 | 0.67                        |
| <i>P. nigrescens</i> ATCC 33563            | 0.73                        |
| <i>S. intermedius</i> ATCC 27335           | 0.76                        |
| <i>S. mitis</i> ATCC 49456                 | 0.76                        |
| <i>S. salivarius</i> ATCC 7073             | 0.72                        |
| <i>T. forsythia</i> ATCC 43037             | 0.75                        |
| <i>V. atypica</i> ATCC 17744               | 0.80                        |
| <i>V. parvula</i> ATCC 10790               | 0.79                        |

\*Concordance is defined as falling into the same category on both tests (i.e., 0-7.5; 7.6-50; 50-200; >200)

**Supplemental Table 2.** Correlations between antibodies to oral bacteria in EPIC samples included in this analysis.

|                | <i>F.perio</i> | <i>P.gin33</i> | <i>P.gin53</i> | <i>A.act29</i> | <i>A.act43</i> | <i>T.forsy</i> | <i>B.dent</i> | <i>A.naes</i> | <i>C.ochr</i> | <i>V.atyp</i> | <i>V.parv</i> | <i>E.corr</i> | <i>C.matr</i> | <i>P.inter</i> | <i>P.mela</i> | <i>P.nigr</i> | <i>P.anae</i> | <i>E.faec</i> | <i>F.magn</i> | <i>P.micra</i> | <i>F.nucl</i> | <i>F.poly</i> | <i>S.inter</i> | <i>S.mitis</i> | <i>S.saliva</i> |
|----------------|----------------|----------------|----------------|----------------|----------------|----------------|---------------|---------------|---------------|---------------|---------------|---------------|---------------|----------------|---------------|---------------|---------------|---------------|---------------|----------------|---------------|---------------|----------------|----------------|-----------------|
| <i>F.perio</i> | 1.0            | .42            | .50            | .44            | .56            | .39            | .60           | .20           | .77           | .63           | .64           | .67           | .22           | .60            | .26           | .37           | .39           | .34           | .33           | .37            | .51           | .78           | .68            | .18            | .55             |
| <i>P.gin33</i> |                | 1.0            | .91            | .36            | .38            | .45            | .44           | .23           | .35           | .47           | .48           | .49           | .34           | .61            | .38           | .41           | .41           | .36           | .36           | .37            | .47           | .47           | .39            | .33            | .41             |
| <i>P.gin53</i> |                |                | 1.0            | .38            | .41            | .45            | .50           | .22           | .45           | .52           | .52           | .54           | .34           | .63            | .36           | .40           | .42           | .35           | .37           | .39            | .47           | .54           | .44            | .31            | .45             |
| <i>A.act29</i> |                |                |                | 1.0            | .94            | .44            | .41           | .27           | .27           | .50           | .53           | .57           | .33           | .49            | .48           | .48           | .43           | .34           | .40           | .39            | .57           | .52           | .41            | .42            | .50             |
| <i>A.act43</i> |                |                |                |                | 1.0            | .42            | .45           | .27           | .43           | .52           | .54           | .39           | .29           | .52            | .39           | .43           | .41           | .31           | .38           | .37            | .53           | .59           | .51            | .33            | .50             |
| <i>T.forsy</i> |                |                |                |                |                | 1.0            | .54           | .32           | .26           | .57           | .60           | .53           | .49           | .65            | .61           | .65           | .56           | .50           | .52           | .51            | .59           | .47           | .43            | .50            | .61             |
| <i>B.dent</i>  |                |                |                |                |                |                | 1.0           | .38           | .53           | .67           | .69           | .69           | .57           | .65            | .49           | .47           | .56           | .55           | .60           | .54            | .51           | .67           | .53            | .42            | .59             |
| <i>A.naes</i>  |                |                |                |                |                |                |               | 1.0           | .20           | .35           | .36           | .39           | .50           | .35            | .35           | .29           | .29           | .31           | .32           | .34            | .29           | .30           | .22            | .32            | .35             |
| <i>C.ochr</i>  |                |                |                |                |                |                |               |               | 1.0           | .49           | .47           | .62           | .12           | .51            | .06           | .17           | .19           | .19           | .16           | .29            | .27           | .67           | .61            | .001           | .43             |
| <i>V.atyp</i>  |                |                |                |                |                |                |               |               |               | 1.0           | .88           | .70           | .51           | .69            | .58           | .57           | .58           | .56           | .56           | .54            | .60           | .67           | .58            | .48            | .68             |
| <i>V.parv</i>  |                |                |                |                |                |                |               |               |               |               | 1.0           | .72           | .52           | .70            | .63           | .64           | .63           | .57           | .60           | .57            | .65           | .68           | .54            | .52            | .70             |
| <i>E.corr</i>  |                |                |                |                |                |                |               |               |               |               |               | 1.0           | .55           | .72            | .53           | .51           | .55           | .53           | .57           | .60            | .56           | .77           | .54            | .42            | .63             |
| <i>C.matr</i>  |                |                |                |                |                |                |               |               |               |               |               |               | 1.0           | .51            | .59           | .45           | .59           | .53           | .64           | .53            | .44           | .40           | .19            | .50            | .43             |
| <i>P.inter</i> |                |                |                |                |                |                |               |               |               |               |               |               |               | 1.0            | .65           | .72           | .59           | .55           | .55           | .58            | .64           | .68           | .54            | .47            | .65             |
| <i>P.mela</i>  |                |                |                |                |                |                |               |               |               |               |               |               |               |                | 1.0           | .76           | .64           | .56           | .62           | .56            | .60           | .40           | .26            | .63            | .59             |
| <i>P.nigr</i>  |                |                |                |                |                |                |               |               |               |               |               |               |               |                |               | 1.0           | .56           | .48           | .52           | .46            | .59           | .45           | .38            | .54            | .61             |
| <i>P.anae</i>  |                |                |                |                |                |                |               |               |               |               |               |               |               |                |               |               | 1.0           | .61           | .74           | .55            | .57           | .46           | .37            | .59            | .57             |
| <i>E.faec</i>  |                |                |                |                |                |                |               |               |               |               |               |               |               |                |               |               |               | 1.0           | .59           | .46            | .48           | .44           | .33            | .48            | .53             |
| <i>F.magn</i>  |                |                |                |                |                |                |               |               |               |               |               |               |               |                |               |               |               |               | 1.0           | .53            | .50           | .43           | .29            | .52            | .51             |
| <i>P.micra</i> |                |                |                |                |                |                |               |               |               |               |               |               |               |                |               |               |               |               |               | 1.0            | .48           | .47           | .36            | .73            | .55             |
| <i>F.nucl</i>  |                |                |                |                |                |                |               |               |               |               |               |               |               |                |               |               |               |               |               |                | 1.0           | .56           | .44            | .49            | .28             |
| <i>F.poly</i>  |                |                |                |                |                |                |               |               |               |               |               |               |               |                |               |               |               |               |               |                |               | 1.0           | .59            | .57            | .56             |
| <i>S.inter</i> |                |                |                |                |                |                |               |               |               |               |               |               |               |                |               |               |               |               |               |                |               |               | 1.0            | .28            | .60             |
| <i>S.mitis</i> |                |                |                |                |                |                |               |               |               |               |               |               |               |                |               |               |               |               |               |                |               |               |                | 1.0            | .63             |

All correlations above .10 were statistically significant (p<. 05)

*F.perio*, *F. periodonticum* ATCC 33693; *P.gin33*, *P. gingivalis* ATCC 33277; *P.gin53*, *P. gingivalis* ATCC 53978; *A.act29*, *A. actinomycetemcomitans* ATCC 29523; *A.act43*, *A. actinomycetemcomitans* ATCC 43718; *T. forsy*, *T. forsythia* ATCC 43037; *B. dent*, *B. dentium* ATCC 27534; *A.naes*, *A. naeslundii* ATCC 12104; *C.ochr*, *C. ochracea* ATCC 33596; *V.atyp*, *V. atypica* ATCC 17744; *V.parv*, *V. parvula* ATCC 10790; *E.corr*, *E. corrodens* ATCC 23834; *C.matr*, *C. matruchotii* ATCC 14266; *P.inter*, *P. intermedia* ATCC 25611; *P.mela*, *P. melaninogenica* ATCC 25845; *P.nigr*, *P. nigrescens* ATCC 33563; *P.anae*, *P. anaerobius* ATCC 27337; *E.faec*, *E. faecalis* ATCC 29212; *F.magn*, *F. magna* ATCC 29328; *P.micra*, *P. micra* ATCC 33270; *F.nucl*, *F. nucleatum* ATCC 25586; *F.poly*, *F. polymorphum* ATCC 10953; *S.inter*, *S. intermedius* ATCC 27335; *S.mitis*, *S. mitis* ATCC 49456; *S.saliva*, *S. salivarius* ATCC 7073.

**Supplemental Table 3 .** Percentage of samples for 4 levels of antibodies to oral bacteria by case and control subjects. Test for trends (across categories) are provided for each bacteria in relation to pancreatic cancer; all statistically significant *p*-values represent significance for inverse associations.

| <b>Bacteria</b>                                                | <b>Controls/Cases with IgG levels 0-7.5 ng/ml (%)</b> | <b>Controls/Cases with IgG levels 7.6-50 ng/ml (%)</b> | <b>Controls/Cases with IgG levels 50-200 ng/ml (%)</b> | <b>Controls/Cases with IgG levels &gt;200 ng/ml (%)</b> | <b>Test for trend P-value*</b> |
|----------------------------------------------------------------|-------------------------------------------------------|--------------------------------------------------------|--------------------------------------------------------|---------------------------------------------------------|--------------------------------|
| Oral pathogens (Gram negative)                                 |                                                       |                                                        |                                                        |                                                         |                                |
| <i>Porphyromonas gingivalis</i> ATCC 33277                     | 20.7/24.0                                             | 26.7/26.2                                              | 35.3/32.6                                              | 17.3/17.3                                               | 0.31                           |
| <i>Porphyromonas gingivalis</i> ATCC 53978                     | 44.5/48.6                                             | 26.2/24.9                                              | 24.8/19.3                                              | 4.6/7.2                                                 | 0.42                           |
| <i>Aggregatibacter actinomycetemcomitans</i> ATCC 29523        | 7.5/10.1                                              | 28.1/29.4                                              | 42.6/40.7                                              | 21.9/19.8                                               | 0.33                           |
| <i>Aggregatibacter actinomycetemcomitans</i> ATCC 43718        | 9.1/11.1                                              | 29.3/29.6                                              | 37.7/39.3                                              | 23.8/20.0                                               | 0.39                           |
| <i>Tannerella forsythia</i> ATCC 43037                         | 42.1/44.9                                             | 38.2/36.3                                              | 17.6/16.5                                              | 2.2/2.2                                                 | 0.67                           |
| Oral bacterial species of the human microbiome (Gram negative) |                                                       |                                                        |                                                        |                                                         |                                |
| <i>Captonocytophaga ochracea</i> ATCC 33596                    | 26.7/31.1                                             | 22.1/22.2                                              | 20.0/15.8                                              | 31.3/30.9                                               | 0.02                           |
| <i>Eikenella corrodens</i> ATCC 23834                          | 17.1/22.0                                             | 27.9/32.6                                              | 42.3/34.8                                              | 12.7/10.6                                               | 0.001                          |
| <i>Fusobacterium nucleatum</i> ATCC 25586                      | 31.0/39.3                                             | 42.3/38.3                                              | 22.1/18.0                                              | 4.6/4.4                                                 | 0.03                           |
| <i>Fusobacterium periodonticum</i> ATCC 33693                  | 65.4/67.9                                             | 25.7/23.0                                              | 8.7/8.6                                                | 0.24/0.49                                               | 0.58                           |
| <i>Fusobacterium polymorphum</i> ATCC 10953                    | 61.8/67.2                                             | 30.8/27.2                                              | 7.2/5.4                                                | 0.24/0.25                                               | 0.06                           |
| <i>Prevotella intermedia</i> ATCC 25611                        | 26.9/31.6                                             | 36.3/37.0                                              | 32.2/26.7                                              | 4.6/4.7                                                 | 0.06                           |
| <i>Prevotella melaninogenica</i> ATCC 25845                    | 10.6/12.1                                             | 31.7/33.1                                              | 46.2/44.2                                              | 11.5/10.6                                               | 0.70                           |
| <i>Prevotella nigrescens</i> ATCC 33563                        | 8.4/14.8                                              | 25.5/29.9                                              | 54.1/44.9                                              | 12.0/10.4                                               | 0.001                          |
| <i>Veillonella atypica</i> ATCC 17744                          | 53.4/58.0                                             | 36.3/32.1                                              | 10.1/9.6                                               | 0.24/0.25                                               | 0.21                           |
| <i>Veillonella parvula</i> ATCC 10790                          | 33.2/38.5                                             | 44.7/39.8                                              | 20.2/20.7                                              | 1.9/0.99                                                | 0.19                           |
| Oral bacterial species of the human microbiome (Gram positive) |                                                       |                                                        |                                                        |                                                         |                                |
| <i>Actinomyces naeslundii</i> ATCC 12104                       | 0.96/0.25                                             | 2.6/4.4                                                | 15.9/17.8                                              | 80.3/77.5                                               | 0.29                           |
| <i>Bifidobacterium dentium</i> ATCC 27534                      | 63.0/67.4                                             | 26.7/23.7                                              | 9.9/7.9                                                | 0.48/0.99                                               | 0.27                           |
| <i>Corynebacterium matruchotii</i> ATCC 14266                  | 56.3/60.4                                             | 28.9/25.3                                              | 13.0/13.6                                              | 1.9/0.74                                                | 0.24                           |

|                                                    |           |           |           |           |       |
|----------------------------------------------------|-----------|-----------|-----------|-----------|-------|
| <i>Enterococcus faecalis</i> ATCC 29212            | 63.0/67.7 | 25.7/23.0 | 10.6/9.1  | 0.72/0.25 | 0.25  |
| <i>Fingoldia magna</i> ATCC 29328                  | 85.1/87.2 | 13.7/11.4 | 1.2/1.2   | 0/0.25    | 0.44  |
| <i>Parvimonas micra</i> ATCC 33270                 | 2.9/3.7   | 6.7/9.4   | 38.2/39.0 | 52.2/47.9 | 0.05  |
| <i>Peptostreptococcus anaerobius</i><br>ATCC 27337 | 88.9/88.4 | 10.1/9.9  | 0.96/1.73 | --        | 0.78  |
| <i>Streptococcus intermedius</i> ATCC 27335        | 35.6/42.2 | 36.5/32.8 | 22.1/19.5 | 5.8/5.4   | 0.03  |
| <i>Streptococcus mitis</i> ATCC 49456              | 0.96/1.5  | 7.7/13.6  | 44.5/41.2 | 46.9/43.7 | 0.02  |
| <i>Streptococcus salivarius</i> ATCC 7073          | 7.9/14.1  | 28.1/30.4 | 52.6/44.9 | 11.3/10.6 | 0.002 |

\*P-values for tests of trends across categories based on conditional logistic regression models (to account for matching factors) and further adjusting for BMI (continuous) and smoking status (never, past, current).

**Supplemental Table 4.** Mean (log) antibody levels by clusters 1 and 2.

| <b>Bacteria**</b>                             | <b>Cluster 1</b> | <b>Cluster 2</b> |
|-----------------------------------------------|------------------|------------------|
| <i>P. gingivalis</i> ATCC 33277               | 1.54             | 4.44             |
| <i>P. gingivalis</i> ATCC 53978               | -1.03            | 3.03             |
| <i>A. actinomycetemcomitans</i><br>ATCC 29523 | 3.11             | 4.65             |
| <i>A. actinomycetemcomitans</i><br>ATCC 43718 | 2.96             | 4.66             |
| <i>T. forsythia</i> ATCC 43037                | -0.18            | 2.77             |
| <i>C. ochracea</i> ATCC 33596                 | 0.35             | 4.62             |
| <i>E. corrodens</i> ATCC 23834                | 0.14             | 4.62             |
| <i>F. nucleatum</i> ATCC 25586                | 0.51             | 3.30             |
| <i>F. periodonticum</i> ATCC 33693            | -3.31            | -0.14            |
| <i>F. polymorphum</i> ATCC 10953              | -3.33            | 0.15             |
| <i>P. intermedia</i> ATCC 25611               | 0.39             | 4.07             |
| <i>P. melaninogenica</i> ATCC 25845           | 2.73             | 4.48             |
| <i>P. nigrescens</i> ATCC 33563               | 2.73             | 4.56             |
| <i>V. atypica</i> ATCC 17744                  | -1.71            | 2.33             |
| <i>V. parvula</i> ATCC 10790                  | -0.30            | 3.65             |
| <i>A. naeslundii</i> ATCC 12104               | 5.15             | 5.39             |
| <i>B. dentium</i> ATCC 27534                  | -2.84            | 1.48             |
| <i>C. matruchotii</i> ATCC 14266              | -1.55            | 1.52             |
| <i>E. faecalis</i> ATCC 29212                 | -1.99            | 1.17             |
| <i>F. magna</i> ATCC 29328                    | -4.24            | -1.13            |
| <i>P. micra</i> ATCC 33270                    | 4.32             | 5.30             |
| <i>P. anaerobius</i> ATCC 27337               | -3.91            | -1.04            |
| <i>S. intermedius</i> ATCC 27335              | 0.13             | 3.13             |
| <i>S. mitis</i> ATCC 49456                    | 4.51             | 5.17             |
| <i>S. salivarius</i> ATCC 7073                | 2.75             | 4.57             |

\* Bacterial names organized as Table 2.
